# Supplementary material for: Preparation of sulfonated carbon-based catalysts from murumuru kernel shell and their performance in the esterification reaction
Source: Royal Society of Chemistry journal article supplement (doi:10.1039/d0ra03217d), 2020-01-01
Supplement: d0ra03217d1.pdf [file d0ra03217d1.pdf]

## **Preparation of sulfonated carbon-based catalysts from murumuru kernel shell and their performance in the esterification reaction**

Ana Paula da Luz Corrêa<sup>a</sup>, Rafael Roberto Cardoso Bastos<sup>a</sup>, Geraldo Narciso da Rocha Filho<sup>a</sup>, José Roberto Zamian<sup>a</sup>, Leyvison Rafael Vieira da Conceição<sup>a\*</sup>.

<sup>a</sup> Federal University of Pará, Institute of Exact and Natural Sciences, Graduate in Chemistry Program, Laboratory of Catalysis and Oleochemical, Belém, Pará, CEP 66075–110, Brazil.

\*Corresponding author. E-mail: [rafaelvieira@ufpa.br](mailto:rafaelvieira@ufpa.br) (L.R.V. da Conceição).

**Table S1.** Fatty acid composition of SFAD, PFAD and CFAD.

| <b>Fatty acid</b>        | <b>Composition (wt%)</b> |             |             |
|--------------------------|--------------------------|-------------|-------------|
|                          | <b>SFAD</b>              | <b>PFAD</b> | <b>CFAD</b> |
| <b>Lauric (C12:0)</b>    | -                        | 2.4         | 52.6        |
| <b>Myristic (C14:0)</b>  | -                        | 1.4         | 22.2        |
| <b>Palmitic (C16:0)</b>  | 12.6                     | 50.4        | 13.0        |
| <b>Stearic (C18:0)</b>   | 3.6                      | 4.8         | 12.2        |
| <b>Oleic (C18:1)</b>     | 28.7                     | 35.0        | -           |
| <b>Linoleic (C18:2)</b>  | 50.8                     | 6.0         | -           |
| <b>Linolenic (C18:3)</b> | 4.3                      | -           | -           |
| <b>Total Saturated</b>   | 16.2                     | 59.0        | 100         |
| <b>Total Unsaturated</b> | 83.8                     | 41.0        | -           |

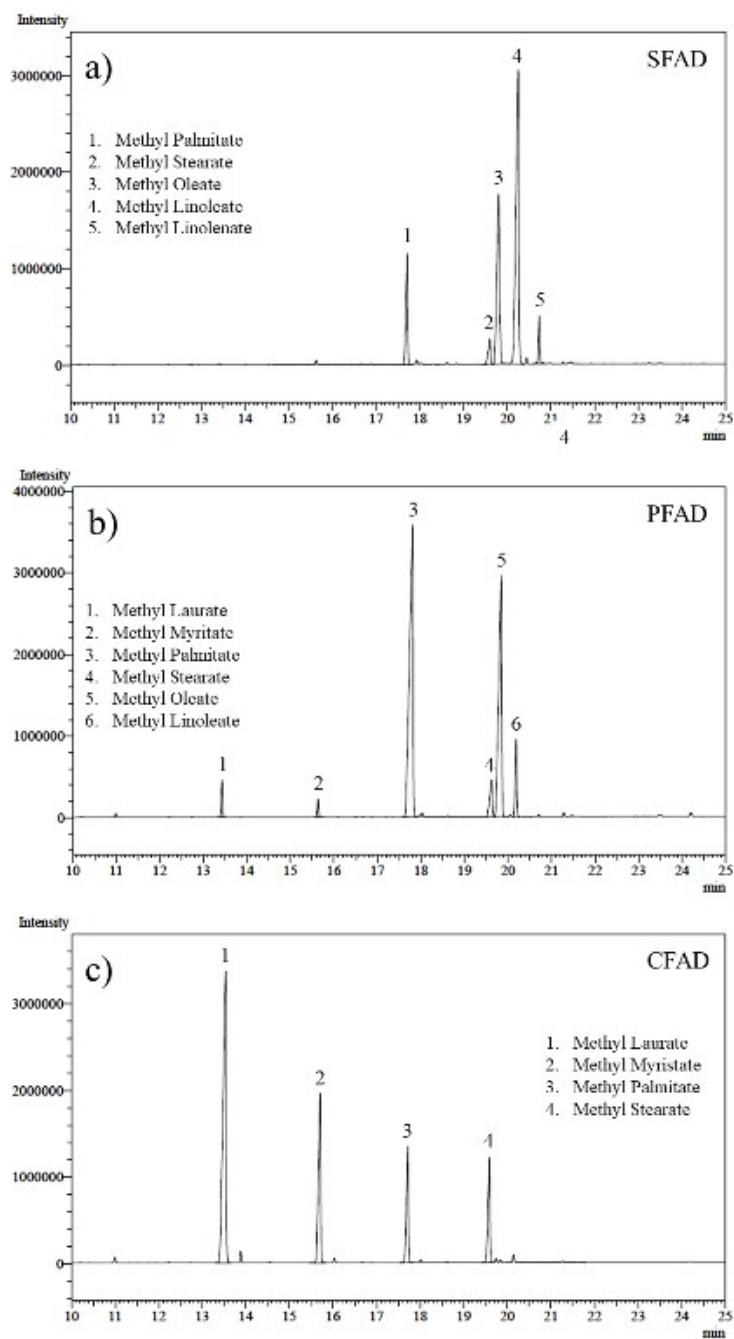

**Fig. S1.** Fatty acid profile of raw materials (a) SFAD, (b) PFAD and (c) CFAD.

## Ester content determination

### Analysis parameters

The ester contents was determined according to the European standard EN 14103, by gas chromatography using heptane as solvent and methyl heptadecanoate as internal standard in a gas chromatograph (GC) Shimadzu, model CG-2010, equipped with a flame ionization detector (FID), capillary column TG-WASMS (30 m length, 0.32 mm diameter, and 0.25  $\mu\text{m}$  film). The mobile phase used was helium gas with a flow rate of 1 mL min<sup>-1</sup> and an injection volume of 1  $\mu\text{L}$ .

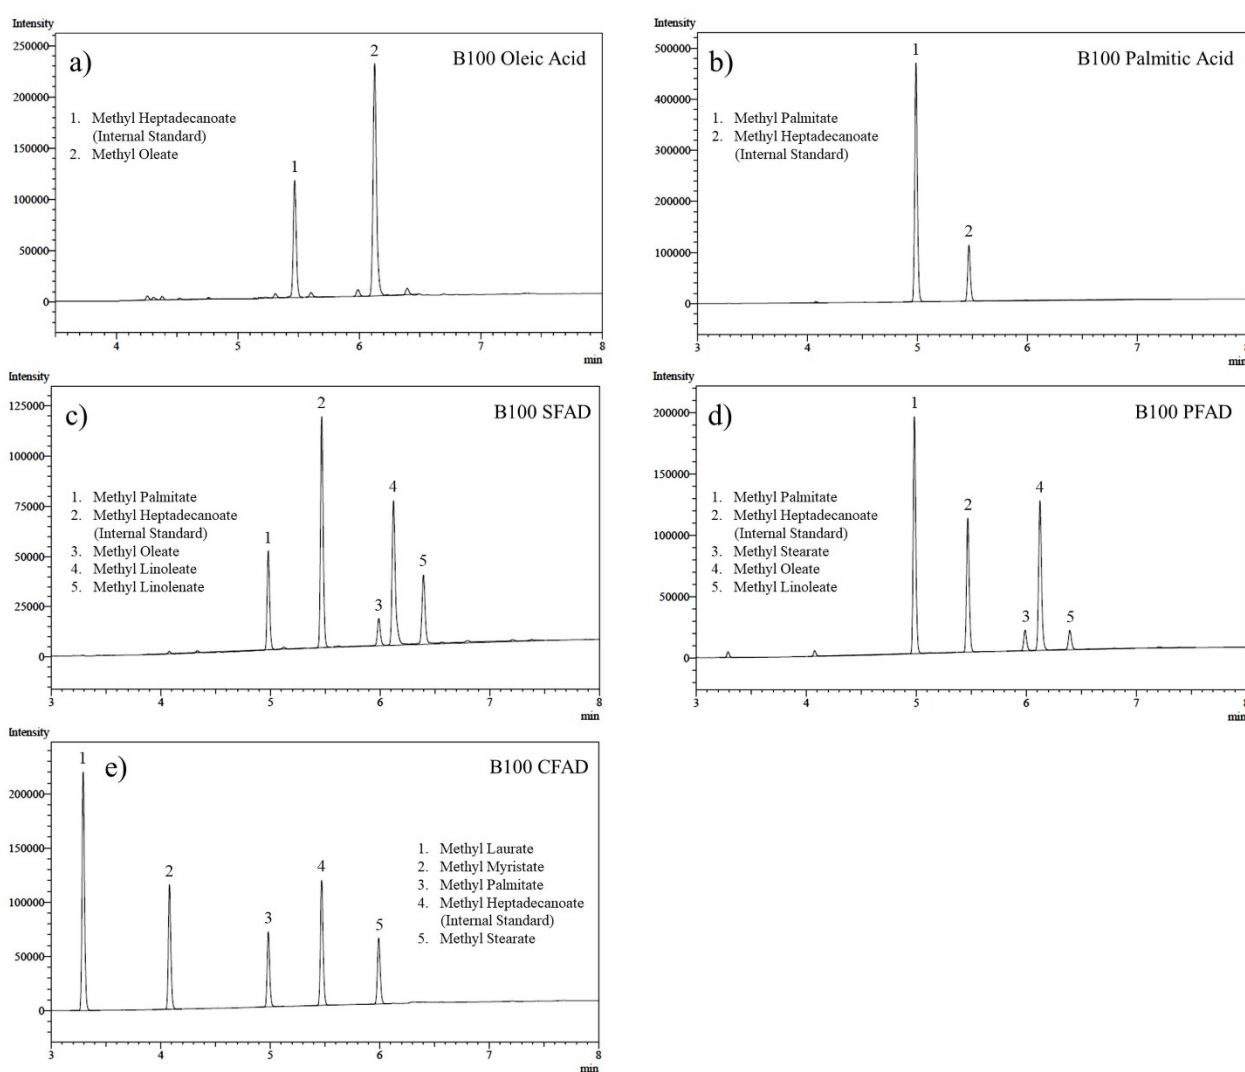

**Fig. S2.** Biodiesel samples chromatograms, (a) B100 oleic acid, (b) B100 Palmitic acid, (c) B100 SFAD, (d) B100 PFAD and (e) CFAD.
